# Supplementary material for: ETTIN (ARF3) physically interacts with KANADI proteins to form a functional complex essential for integument development and polarity determination in Arabidopsis
Source: Oxford University Press journal article supplement (doi:10.1242/dev.067918), 2012-02-02
Supplement: dev067918tables1.pdf [file dev067918tables1.pdf]

**Table S1. Primers used for cloning**

| <b>Primer</b> | <b>Sequence (5'-3')</b>          | <b>Vector</b> | <b>Type</b> |
|---------------|----------------------------------|---------------|-------------|
| ETT R1        | CTAGAGAGCAATGTCTAGCAACATGT       | pAA24         | Reverse     |
| DK255         | CACCATGGAGCTGTTTCCTGCTCAGCC      | pAA29         | Forward     |
| DK257         | TTAGTGAGATCGACCCAGAGTAAACTCAAG   | pAA29         | Reverse     |
| DK258         | CACCATGGAATTTGACTTGAATACTGAGA    | pAA30         | Forward     |
| DK260         | TCAAACCCTAGTGATTGTAGGAGA         | pAA30         | Reverse     |
| DK240         | CaccATGATGATGTTAGAGTCAAGAAACA    | pAA34         | Forward     |
| DK272         | GCACTTGAGAAGGGTTAAATCA           | pAA34         | Reverse     |
| 116ETTfor     | CTTCTCGAGATGGGTGGTTTA            | pCG54         | Forward     |
| 116ETTrev     | CTTCCC GGGAGAGCAATGTCTAGCAAC     | pCG54         | Reverse     |
| 115ATSfor     | CTTCTCGAGATGATGATGTTAGAG         | pCG51         | Forward     |
| 115ATSrev     | CTTCCC GGGCACTTGAGAAGGGTTAAA     | pCG51         | Reverse     |
| ATSFNdel      | GGAATTCCATATGATGATGATGTTAGAGTC   | pDK8          | Forward     |
| ATSRNcol      | CATGCCATGGTTAGCACTTGAGAAG        | pDK8          | Reverse     |
| DK244         | CACCATGGGTGGTTTAATCGATCTGA       | pDK74, pAA24  | Forward     |
| ETT R2        | GAGAGCAATGTCTAGCAACATGTC         | pDK74         | Reverse     |
| DK290         | ACTCGAGATGATGATGTTAGAGTCAAGAAACA | pDK115        | Forward     |
| DK291         | AACCCGGGGCACTTGAGAAGGGTTAAATCA   | pDK115        | Reverse     |
| DK298         | ACTCGAGATGGGTGGTTTAATCGATCTGA    | pDK116        | Forward     |
| DK299         | AACCCGGGGAGAGCAATGTCTAGCAACATGTC | pDK116        | Reverse     |
| kan15'bam     | ATAGGATCCATATGTCTATGGAAGGTGTTTTT | pLMK37/44/46  | Forward     |
| kan13'pst     | TATCTGCAGTTTCTCGTGCCAATCTGG      | pLMK37/44/46  | Reverse     |
